# Supplementary material
Source: HighWire-hosted journal article supplement (https://injuryprevention.bmj.com/content/injuryprev-2020-044139)
Supplement: inline-supplementary-material-1 [file inline-supplementary-material-1.pdf]

## Online Appendix

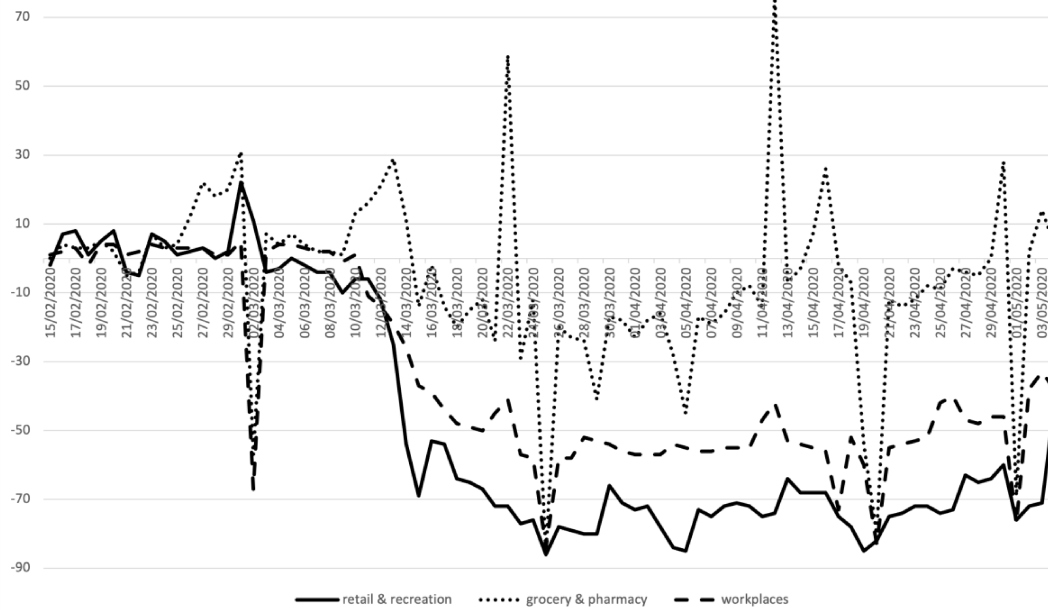

Figure A1 – Mobility trends before and during the first lockdown in Greece. Based on data from "Google COVID-19 Community Mobility Reports", Google LLC. Available at: <https://www.google.com/covid19/mobility/> Accessed: 20 December 2020.

Table A1. Summary Statistics

| Variable                               | Mean  | Std. Dev. | Min  | Max  |
|----------------------------------------|-------|-----------|------|------|
| Collisions                             | 17.21 | 64.62     | 0    | 572  |
| Deaths                                 | 1.15  | 2.40      | 0    | 23   |
| Serious injuries                       | 1.27  | 2.78      | 0    | 28   |
| Minor injuries                         | 19.36 | 73.51     | 0    | 634  |
| Treatment period dummy (March - April) | 0.75  | 0.43      | 0    | 1    |
| Treatment group dummy (2020)           | 0.17  | 0.37      | 0    | 1    |
| Unemployment rate                      | 20.77 | 3.40      | 14.9 | 27.4 |
| Petrol price per litre in Euros        | 1.50  | 0.09      | 1.32 | 1.65 |

*N*=2,448. Data at regional unit level.

Table A2. Difference-in-differences regression results, months January – August

| Dependent variable:                       | (1)<br>Collisions               | (2)<br>Deaths                  | (3)<br>Serious injuries        | (4)<br>Minor injuries           |
|-------------------------------------------|---------------------------------|--------------------------------|--------------------------------|---------------------------------|
| Diff-in-diff interaction term             | -7.294***<br>[-10.698 - -3.890] | -0.538***<br>[-0.874 - -0.203] | -0.414**<br>[-0.752 - -0.077]  | -8.878***<br>[-13.123 - -4.633] |
| Treatment period dummy<br>(Mrch - August) | 5.549***<br>[3.613 - 7.485]     | 0.709***<br>[0.514 - 0.905]    | 1.032***<br>[0.782 - 1.281]    | 6.952***<br>[4.675 - 9.228]     |
| Treatment group dummy<br>(2020)           | 3.161***<br>[1.113 - 5.210]     | 0.186<br>[-0.082 - 0.454]      | 0.256**<br>[0.005 - 0.507]     | 4.028***<br>[1.338 - 6.718]     |
| unemployment rate                         | 0.167*<br>[-0.030 - 0.364]      | 0.024**<br>[0.002 - 0.046]     | 0.094***<br>[0.064 - 0.124]    | 0.185<br>[-0.051 - 0.421]       |
| petrol prices per litre                   | -1.805<br>[-9.266 - 5.655]      | -0.504<br>[-1.201 - 0.193]     | 0.613<br>[-0.280 - 1.506]      | -1.635<br>[-10.510 - 7.240]     |
| Constant term                             | 2.658<br>[-11.461 - 16.777]     | 0.455<br>[-0.945 - 1.856]      | -2.725***<br>[-4.600 - -0.851] | 2.622<br>[-14.305 - 19.549]     |
| Observations                              | 2,448                           | 2,448                          | 2,448                          | 2,448                           |
| R-squared                                 | 0.969                           | 0.773                          | 0.758                          | 0.965                           |
| F-statistic                               | 117.3                           | 24.43                          | 24.55                          | 96.95                           |

Month dummies and regional unit fixed effects are included in the regressions. Robust 95% CI in brackets.

\*\*\*  $p < 0.01$ , \*\*  $p < 0.05$ , \*  $p < 0.1$

Table A3 – Interrupted Time Series Analysis, months January – August

| Dependent variable: | (1)<br>Collisions     | (2)<br>Deaths       | (3)<br>Serious injuries | (4)<br>Minor injuries   |
|---------------------|-----------------------|---------------------|-------------------------|-------------------------|
| pre-treatment trend | -0.204*               | -0.029***           | -0.084***               | -0.217                  |
|                     | [-0.416 - 0.008]      | [-0.051 - -0.007]   | [-0.116 - -0.052]       | [-0.477 - 0.044]        |
| change in level     | -352.376***           | -29.556***          | -15.801***              | -426.849***             |
|                     | [-416.800 - -287.952] | [-36.552 - -22.560] | [-24.754 - -6.848]      | [-504.818 - -348.880]   |
| change in trend     | -180.796***           | -2.971***           | -4.916***               | -212.783***             |
|                     | [-181.008 - -180.584] | [-2.993 - -2.949]   | [-4.948 - -4.884]       | [-213.044 - -212.523]   |
| Constant            | 962.099***            | 68.271***           | 83.904***               | 1,080.923***            |
|                     | [903.951 - 1,020.247] | [62.630 - 73.913]   | [74.586 - 93.222]       | [1,008.619 - 1,153.227] |
| Observations        | 64                    | 64                  | 64                      | 64                      |
| F-statistic         | 368.1                 | 299.0               | 149.3                   | 349.4                   |

95% CI in brackets. \*\*\* p<0.01, \*\* p<0.05, \* p<0.1
